# Supplementary material for: FEA-Guided 3D Printing of Gradient-Modulus Polyvinyl Alcohol-Based Hydrogel Meniscus with Biomechanically Optimized Heterogeneity
Source: Research Square preprint supplement (doi:10.21203/rs.3.rs-6832516/v1), 2025-07-01
Supplement: Supplementary file 1 [file 667ac8bc1c8b301c7192a462.docx]

**Table S1. Material parameters of heterogeneous vs. homogeneous meniscus models**

| **Meniscus Type** | **Zone ID** | **Elastic Modulus (MPa)** | **Poisson's Ratio** |
| --- | --- | --- | --- |
| **Heterogeneous** | 1 | 35.85 | 0.49 |
| 2 | 77.57 |
| 3 | 42.59 |
| 4 | 118.55 |
| 5 | 15.22 |
| 6 | 28.07 |
| 7 | 83.95 |
| 8 | 42.68 |
| 9 | 1.83 |
| 10 | 14.56 |
| 11 | 38.55 |
| 12 | 37.13 |
| **Homogeneous** | - | 43.91 | - |


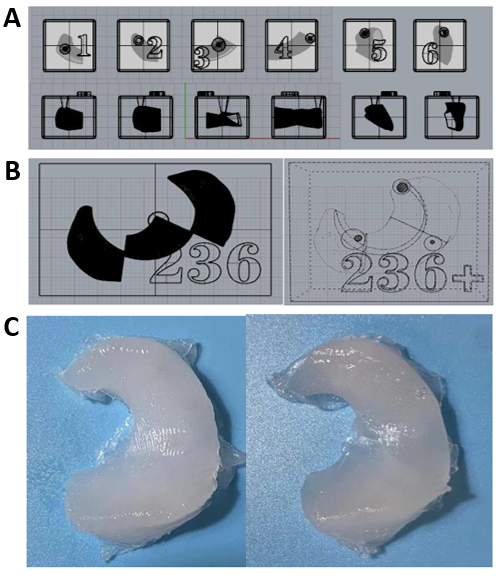


**Figure S1. Fabrication of PVA-H heterogeneous meniscus by two kinds of molds.**

**(A)** **The first mold** **to fabricate** PVA-H heterogeneous meniscus, in which the meniscus was **divided into 6 zones.** (B) The second mold to fabricate PVA-H heterogeneous meniscus, in which the meniscus was divided into 3 zones.(C) Comparison diagram of PVA-H heterogeneous meniscus made by two kinds of molds.
